# Supplementary material for: Programmable spherical nucleic acids integrated with MOF-confined copper nanoclusters facilitate electrochemiluminescence detection of prostate-specific biomarkers
Source: Royal Society of Chemistry journal article supplement (doi:10.1039/d5tb00367a), 2025-01-01
Supplement: d5tb00367a1.pdf [file d5tb00367a1.pdf]

## Supplementary Information

### Programmable spherical nucleic acids integrated with MOF-confined copper nanoclusters facilitate electrochemiluminescent detection of prostate-specific biomarkers

Yi Li<sup>a</sup>, Mei-Ling Liu<sup>a</sup>, Wen-Jing Yang<sup>a</sup>, Xue-Mei Zhou<sup>b</sup>, Ying Zhuo<sup>b\*</sup>, and Xiao-Jing He<sup>a\*</sup>

<sup>a</sup>*Department of Radiology, The Second Affiliated Hospital of Chongqing Medical University, Chongqing.*

<sup>b</sup>*Chongqing Engineering Laboratory of Nanomaterials & Sensor Technologies, College of Chemistry and Chemical Engineering, Southwest University, Chongqing.*

\* Corresponding author at: **Tel/Fax:** +86 23 63693238; **Tel/Fax:** +86 23 68253172.

**E-mail address:** he\_xiaojing@hospital.cqmu.edu.cn. (X. J. He);  
yingzhuo@swu.edu.cn. (Y. Zhuo).

|    |                                                                                                          |           |
|----|----------------------------------------------------------------------------------------------------------|-----------|
| 1  | <b>Table of Contents</b>                                                                                 |           |
| 2  | <b>1. Experimental Section</b>                                                                           |           |
| 3  | 1.1. Reagents and materials.....                                                                         | 3         |
| 4  | 1.2. Apparatus.....                                                                                      | 5         |
| 5  | 1.3. The assembly process of the DNA nanostructures.....                                                 | 6         |
| 6  | 1.4. Synthesis of gold-magnetic nanoparticles (Au@Fe <sub>3</sub> O <sub>4</sub> ).....                  | 6         |
| 7  |                                                                                                          |           |
| 8  | <b>2. Results and discussion</b>                                                                         |           |
| 9  | 2.1. The size distribution of Cu NCs.....                                                                | 7         |
| 10 | 2.2. Inductively coupled plasma mass spectrometry (ICP-MS) analysis of Cu element                        |           |
| 11 | in Cu NCs@Zn-MOF.....                                                                                    | 8         |
| 12 | 2.3. The X-ray diffraction (XRD) and inductively coupled plasma mass spectrometry                        |           |
| 13 | (FTIR) analysis of Cu NCs@Zn-MOF and Zn-MOF .....                                                        | 8         |
| 14 | 2.4. The TEM characterization of Au@Fe <sub>3</sub> O <sub>4</sub> .....                                 | 8         |
| 15 | 2.5. The element analysis of Cu NCs@Zn-MOF.....                                                          | 9         |
| 16 | 2.6. The ECL stability of Cu NCs@Zn-MOF.....                                                             | 9         |
| 17 | 2.7. The probable ECL mechanism of Cu NCs@Zn-MOF-S <sub>2</sub> O <sub>8</sub> <sup>2-</sup> system..... | 10        |
| 18 | 2.8. The characterizations of biosensor establishment process.....                                       | 10        |
| 19 | 2.9. Quantitative analysis of band intensities in PAGE analysis.....                                     | 12        |
| 20 | 2.10. Exploration of the optimal experimental conditions.....                                            | 13        |
| 21 | 2.11. The calculation procedure of detection limit.....                                                  | 14        |
| 22 | 2.12. Comparison of different methods for AMACR detection.....                                           | 15        |
| 23 |                                                                                                          |           |
| 24 | <b>References.....</b>                                                                                   | <b>15</b> |

## 1. Experimental section

### 1.1. Reagents and materials

Copper sulfate pentahydrate ( $\text{CuSO}_4 \cdot 5\text{H}_2\text{O}$ ), potassium persulfate ( $\text{K}_2\text{S}_2\text{O}_8$ ), tris (2-carboxyethyl) phosphine hydrochloride (TCEP) and potassium ferricyanide ( $\text{K}_4[\text{Fe}(\text{CN})_6]$ ) were brought from Sigma-Aldrich Co. (St. Louis, MO, USA). Zinc acetate dihydrate ( $(\text{CH}_3\text{COO})_2\text{Zn}$ ) was provided by the Macklin Biochemical Co., Ltd (Shanghai, China). Glutathione (GSH) and 6-mercapto-1-hexanol (MCH) were purchased from J&K Technology Co., Ltd. (Beijing, China). Sodium hydroxide (NaOH) of analytical reagent grade was supplied by Chemical Reagent Co. (Chongqing, China). N, N-dimethylformamide (DMF) was purchased from Chengdu Kelong Chemical Industry (Chengdu, China). Terephthalic acid ( $\text{H}_2\text{BDC}$ ) was obtained from Qiang Shun Chemical Co. (Shanghai, China). Amino-modified  $\text{Fe}_3\text{O}_4$  magnetic beads ( $\text{NH}_2\text{-Fe}_3\text{O}_4$ , 100-200 nm) were provided by Beijing Bailingwei Chemical Industry (Beijing, China). Ultrapure water was purified by a Millipore Milli-Q water purification system with an electric resistance of 18.2  $\text{M}\Omega/\text{cm}$  and used throughout the experiment. All reagents and solvents were used as received without further purification.

The alpha-methylacyl-CoA racemase (AMACR) was purchased from Shanghai Chemtron Biotech Co., Ltd (Shanghai, China). The common cancer biomarkers, including PTK-7, MUC1, CD63, and TB were obtained from Beijing Bioss Co., Ltd (Beijing, China). The Engen® Lba Cas12a (cpf1) and NEB buffer 2.1 were purchased

1 from Shanghai Titan Scientific Co., Ltd (Shanghai, China). The human AMACR  
2 enzyme-linked immunosorbent assay kit was obtained from Jiangsu enzyme  
3 immunity experiment Co., Ltd (Jiangsu, China). The Rnase-free water was purchased  
4 from Genview (Shanghai, China) to dissolve and store AMACR. HPLC-purified  
5 DNA and crRNA were obtained from Shanghai Sangon Biological Engineering  
6 Technology & Services Co., Ltd. (Shanghai, China). All the serums used in this work  
7 were acquired from the Chongqing Ninth People's Hospital. This study has been  
8 approved by the Ethics Committee and Institutional Review Boards of the hospital.  
9 The sequence information for the nucleic acids used in this study is shown in Table  
10 S1:

11 **Table S1.** Sequence information for the nucleic acids used in this study.

| Name                              | Sequences (5' - 3')                                                                                  |
|-----------------------------------|------------------------------------------------------------------------------------------------------|
| Hairpin 1 (H1)                    | SH-TTT TAC ACA CCC TAC GG/idsp/ GCT AAC GGC AGA GAT<br>TCC CCA GGT AAA CAC ACA AAC GAC TAG GGT GTG T |
| Hairpin 2 (H2)                    | SH-TTT ATG TCA TGG CCA CC/idsp/ TGC TAC AAG AGA GAA<br>AGC CCA GGT AAA CAC ACA AAC GAC GGC CAT GAC A |
| Padlock                           | TAG CCC ACT AAG GTT TGT GTG TTT ACC TGG GCT TAA<br>TCA ACG                                           |
| Locker                            | ACC TTA GTG GGC TAC GTT GAT TAA GCC CAG G                                                            |
| Aptamer <sup>[1]</sup>            | CCC TAC GGC GCT AAC CCA TGC TAC GAA TTC GTT GTT<br>AAA CAA TAG GCC ACC GTG CTA CAA                   |
| DNA walker                        | TTG TAG CAC GGT GGC CAT AAC AAA TTG TTG CTT AAG<br>CAC GGA GCG ACC TAA CCG TGC CGT TAG CGC CGT AGG G |
| Ferrocene-labeled DNA<br>(Fc-DNA) | SH-(CH <sub>2</sub> ) <sub>6</sub> -AAC CGC TTC CCC GAC TTC C-Fc                                     |
| crRNA                             | UAA UUU CUA CUA AGU GUA GAU AAG GUU UGU GUG<br>UUU ACC UG                                            |

12 Furthermore, the buffers applied in this study are listed as follows:

1 (1) 1×TE buffer (10.0 mM Tris-HCl, 1.0 mM EDTA, pH 8.0) was used to dissolve  
2 and store DNA in this study.

3 (2) DNA hybridization buffer (10.0 mM Tris-HCl, 1.0 mM EDTA, and 1.0 M NaCl,  
4 pH 7.0) was used as the reaction buffer for DNA hybridization.

5 (3) Tris-HCl (140.0 mM NaCl, 5.0 mM CaCl<sub>2</sub>, 1.0 mM MgCl<sub>2</sub>, pH 7.6) was used to  
6 dissolve and store Fc-DNA.

7 (4) The phosphate buffer saline (PBS, 0.1 M, pH 7.4) consisted of 0.1 M KH<sub>2</sub>PO<sub>4</sub>, 0.1  
8 M Na<sub>2</sub>HPO<sub>4</sub>, and 0.1 M KCl. The S<sub>2</sub>O<sub>8</sub><sup>2-</sup> solution (10.0 mM, pH 7.4) was prepared by  
9 dissolving the solid K<sub>2</sub>S<sub>2</sub>O<sub>8</sub> in 0.1 M PBS.

10 (5) 5×TBE buffer (445.0 mM tris, 445.0 mM boric acid, 10.0 mM EDTA, pH 8.0)  
11 was used in polyacrylamide gel electrophoresis (PAGE).

## 12 1.2. Apparatus

13 The electrochemical and ECL measurements were recorded on MPI-E  
14 multifunctional electrochemical and chemiluminescent analytical systems (Xi'an  
15 Remax Electronic Science & Technology Co. Ltd., Xi'an, China). Cyclic voltammetric  
16 (CV) measurements were recorded by CHI 660A electrochemistry work station  
17 (Shanghai Chenhua Instruments, China), which utilized a conventional three-electrode  
18 system including a modified glassy carbon electrode (GCE) as the working electrode,  
19 a saturated calomel electrode (SCE) as the reference electrode, and a platinum wire as  
20 the auxiliary electrode. The morphology and size of the synthesized nanomaterials  
21 were characterized by the ZEISS Gemini 300 scanning electron microscopy (SEM,

1 Zeiss, Germany) and FEI Tecnai G2 F20 transmission electron microscopy (TEM,  
2 FEI, USA). X-ray photoemission spectroscopy (XPS) measurement was investigated  
3 by Thermo Scientific K-Alpha (Thermo Fisher Scientific, USA). Fluorescence  
4 characterization was performed on a FL-5700 spectrophotometer (Hitachi, Tokyo,  
5 Japan). ECL spectra were analyzed by the ECL spectrum system, concluding the  
6 electrochemical workstation (Vertex, Ivium Technologies Co., Ltd., Netherlands), the  
7 spectrometer (Kymera 193i, Andor, U.S.A), and the Multi-spectral EMCCD (Newton,  
8 Andor, U.S.A) integrated with a Newton EMCCD spectroscopy detector (Andor Co.,  
9 Tokyo, Japan). Native PAGE was carried out with a BG-verMIDI standard vertical  
10 electrophoresis apparatus (Baygene, China) and a Gel Doc XR+ System (Bio-Rad,  
11 USA).

### 12 1.3. The assembly process of the DNA nanostructures

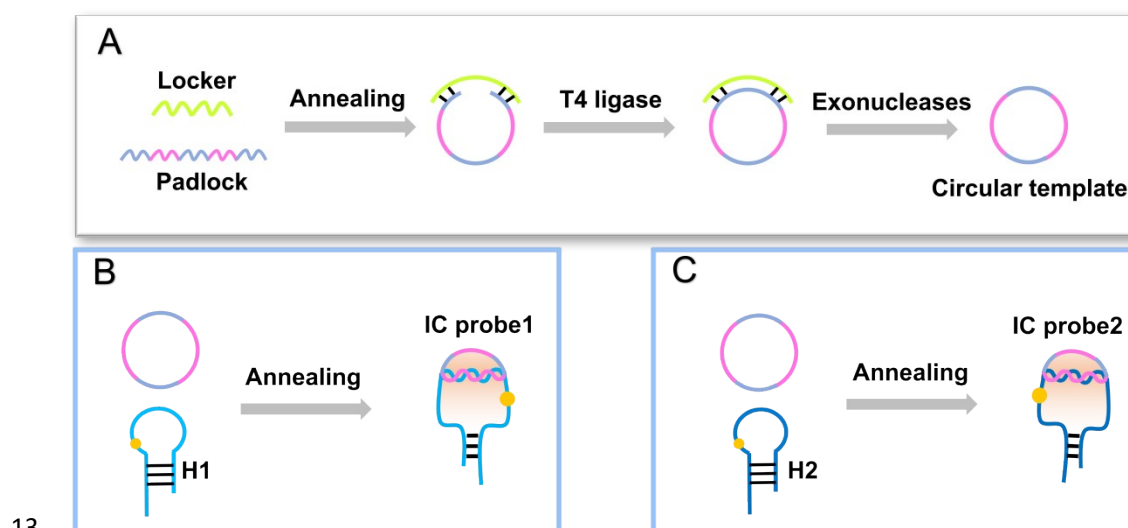

14 **Fig. S1** The assembly process of (A) circular template, (B) IC probe1, and (C) IC probe2.

### 15 1.4. Synthesis of gold-magnetic nanoparticles (Au@Fe<sub>3</sub>O<sub>4</sub>)

1 To start with, we synthesized the Au nanoparticles (Au NPs, 16 nm) based on the  
2 classic method.<sup>2</sup> Specifically, 40 mL of HAuCl<sub>4</sub> (0.01%) solution was heated to boil  
3 under constant stirring. Following that, 1 mL of trisodium citrate (1%) solution was  
4 mixed with the above solution under stirring and kept boiling for 15 min. After that,  
5 the color of the solution turned wine red, demonstrating the successful synthesis of the  
6 Au NPs. Then, the mixture was cooled to room temperature and stored at 4 °C for  
7 further use.

8 According to the previous literature, the Au@Fe<sub>3</sub>O<sub>4</sub> was synthesized in the  
9 following steps.<sup>3</sup> Briefly, 500 μL of the NH<sub>2</sub>-Fe<sub>3</sub>O<sub>4</sub> suspension was washed three  
10 times with deionized water. Then, the as-prepared Au NPs solution (3 mL) was added  
11 to the NH<sub>2</sub>-Fe<sub>3</sub>O<sub>4</sub> suspension and stirred at 4 °C for 12 h. Subsequently, the  
12 Au@Fe<sub>3</sub>O<sub>4</sub> were obtained after magnetic separation and redispersed in PBS buffer (1  
13 mL) for the following experiments.

## 14 2. Results and discussion

### 15 2.1. The size distribution of Cu NCs

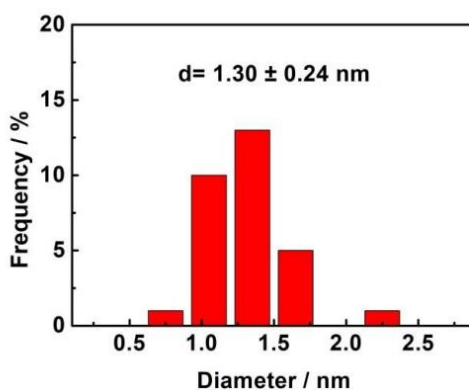

16  
17 **Fig. S2** The histogram of the size distribution of Cu NCs.

2.2. Inductively coupled plasma mass spectrometry (ICP-MS) analysis of Cu element in Cu NCs@Zn-MOF

Table S2. ICP-MS analysis of Cu element in Cu NCs@Zn-MOF.

| Sample quality (g) | Volume (mL) | Concentration of Cu element (ug/L) | Quality of Cu element (ug/kg) | Wt (%) |
|--------------------|-------------|------------------------------------|-------------------------------|--------|
| 0.0446             | 25          | 142441.475                         | 78696703.222                  | 7.86   |

2.3. The X-ray diffraction (XRD) and inductively coupled plasma mass spectrometry (FTIR) analysis of Cu NCs@Zn-MOF and Zn-MOF

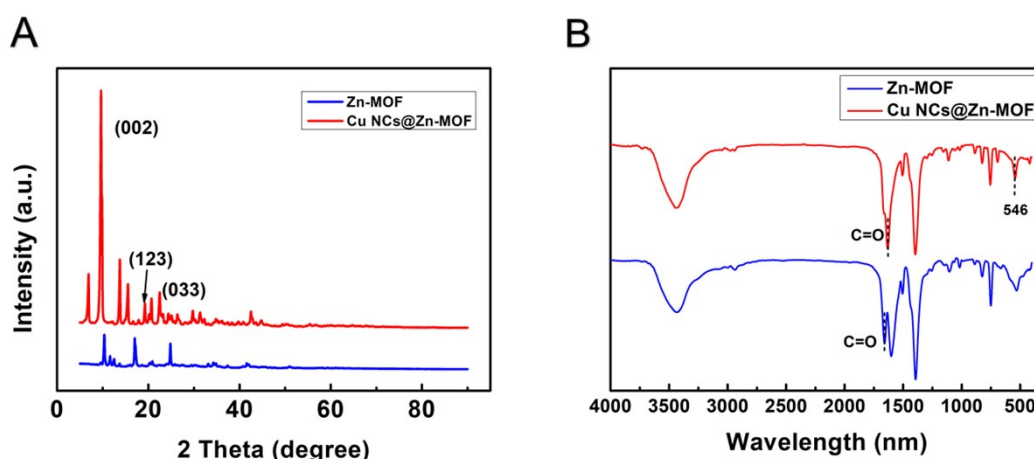

Fig. S3 The (A) XRD and (B) FTIR analysis of Cu NCs@Zn-MOF and Zn-MOF.

2.4. The TEM characterization of Au@Fe<sub>3</sub>O<sub>4</sub>

The morphological and size of the prepared Au@Fe<sub>3</sub>O<sub>4</sub> was performed by the transmission electron microscopy (TEM) measurements. As shown in Fig. S4, the synthesized Au@Fe<sub>3</sub>O<sub>4</sub> appeared as a spherical structure with an average particle size of 100 nm.



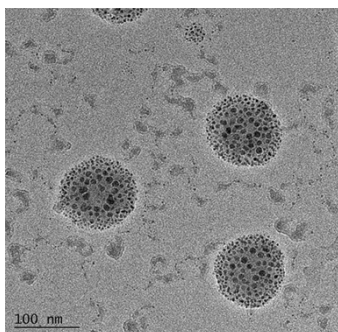

**Fig. S4** The TEM characterization of Au@Fe<sub>3</sub>O<sub>4</sub>.

### 2.5. The element analysis of Cu NCs@Zn-MOF

**Table S3.** The element analysis of Cu NCs@Zn-MOF.

| Element           | C    | O  | Cu   | Zn    |
|-------------------|------|----|------|-------|
| Weight percentage | 54.7 | 29 | 2.63 | 13.81 |

### 2.6. The ECL stability of Cu NCs@Zn-MOF

The ECL stability of Cu NCs@Zn-MOF was evaluated by continuously scanning at different periods. As displayed in Fig. S5A, the newly prepared Cu NCs@Zn-MOF showed excellent stability with a relative standard deviation (RSD) of 0.3%. Furthermore, after storing for a month at 4 °C, Cu NCs@Zn-MOF exhibited the ECL response of 13435 a.u. with the RSD of 1.0% under continuous potential scanning (Fig. S5B), suggesting the satisfactory stability of Cu NCs@Zn-MOF.

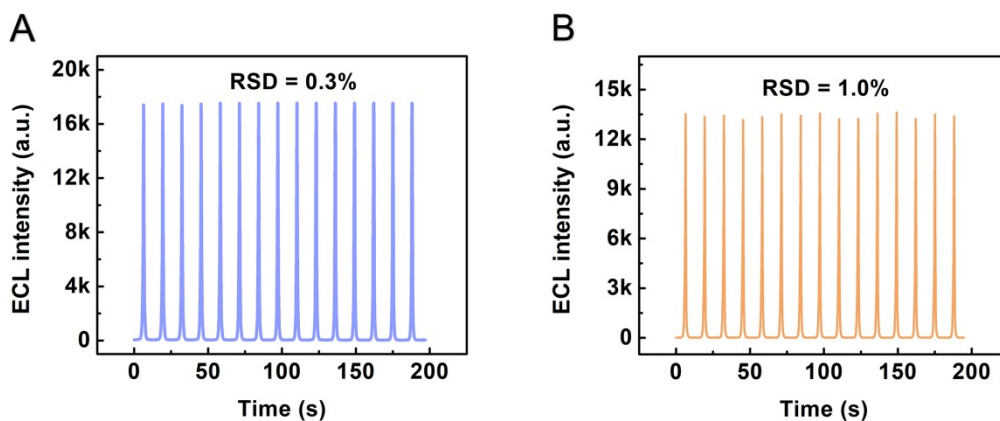

1

2 **Fig. S5** The ECL stability of (A) the newly prepared Cu NCs@Zn-MOF and (B) the Cu NCs@Zn-  
3 MOF after storing for a month at 4 °C.

#### 4 **2.7. The probable ECL mechanism of Cu NCs@Zn-MOF-S<sub>2</sub>O<sub>8</sub><sup>2-</sup> system**

5 Briefly, the Cu NCs were protonated into the radical anion of Cu NCs (Cu  
6 NCs<sup>•-</sup>). At the same time, the Zn-MOF with micro-nano structure boosted the  
7 reduction of S<sub>2</sub>O<sub>8</sub><sup>2-</sup> to generate the strong oxidizing intermediate radical (SO<sub>4</sub><sup>•-</sup>). The  
8 SO<sub>4</sub><sup>•-</sup> further reacted with Cu NCs<sup>•-</sup> to form a large number of excited-state species  
9 (Cu NCs\*), which returned to the ground state accompanied by the ECL emission  
10 producing. The possible emitting mechanism was depicted as the following equations:

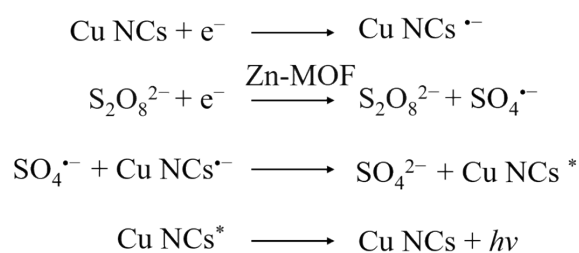

11

#### 12 **2.8. The characterizations of biosensor establishment process**

13 To affirm the successful assembly steps of the proposed biosensor, CV and  
14 electrochemical impedance spectroscopy (EIS) measurements were implemented

1 under a potential scan cycle of -2.0 ~ 0 V in 0.1 M PBS with 5 mM  $[\text{Fe}(\text{CN})_6]^{3-/4-}$ . In  
2 Fig. S6A, a pair of redox peaks could be seen (curve *a*), which was attributed to the  
3 reversible redox reaction of  $[\text{Fe}(\text{CN})_6]^{3-/4-}$  on the bare GCE. When Cu NCs@Zn-  
4 MOF was dropped to the surface of the GCE, the insulated organic ligand of the Zn-  
5 MOF resulted in a reduced current (curve *b*). When incubated with Au NPs, the  
6 current of Au NPs/Cu NCs@Zn-MOF/GCE had a slight increase (curve *c*), which  
7 corresponded to the good electrical conductivity of Au NPs. Subsequently, a  
8 remarkably decreased current (curve *d*) could be observed along with the incubation  
9 of Fc-DNA due to its electrostatic repulsion. Furthermore, when MCH was modified  
10 onto the resultant electrode surface, the peak current did not change significantly  
11 (curve *e*). Finally, after incubation with the activated CRISPR/Cas12a, the redox peak  
12 current prominently increased (curve *f*), which originated from the cleavage of the Fc-  
13 DNA by the activated CRISPR/Cas12a.

14 EIS measurement was another approach to confirm the stepwise fabrication of  
15 the proposed biosensor, which reflected the electron transfer resistance ( $R_{\text{et}}$ ) through  
16 the semicircle diameter of EIS and revealed the electron transfer kinetics of the  
17 electrode interface. As shown in Fig. S6B, a small semicircle (curve *a*) suggested a  
18 clear GCE was obtained for the construction of the biosensor. Following that, the  
19 value of  $R_{\text{et}}$  of Cu NCs@Zn-MOF/GCE (curve *b*) was increased obviously due to the  
20 insulating property of Zn-MOF. When Au NPs were dropped on the modified GCE,  
21 the  $R_{\text{et}}$  decreased (curve *c*), which might be speculated that Au NPs enlarged the  
22 effective contact area to accelerate electron transfer. A remarkably enhanced value of

1  $R_{et}$  could be observed when Fc-DNA was incubated with the resultant GCE (curve *d*),  
 2 which was attributed to the electronic repulsion between negatively charged Fc-DNA  
 3 and  $[Fe(CN)_6]^{3-/4-}$ . Subsequently, the MCH was decorated on the above electrode to  
 4 block the unreacted sites, resulting in the further increased value of  $R_{et}$  (curve *e*).  
 5 Finally, the  $R_{et}$  was decreased after the incubation with the activated CRISPR system  
 6 (curve *f*), implying that the activated CRISPR system with trans-cleavage ability  
 7 could release the Fc-DNA away from the electrode surface.

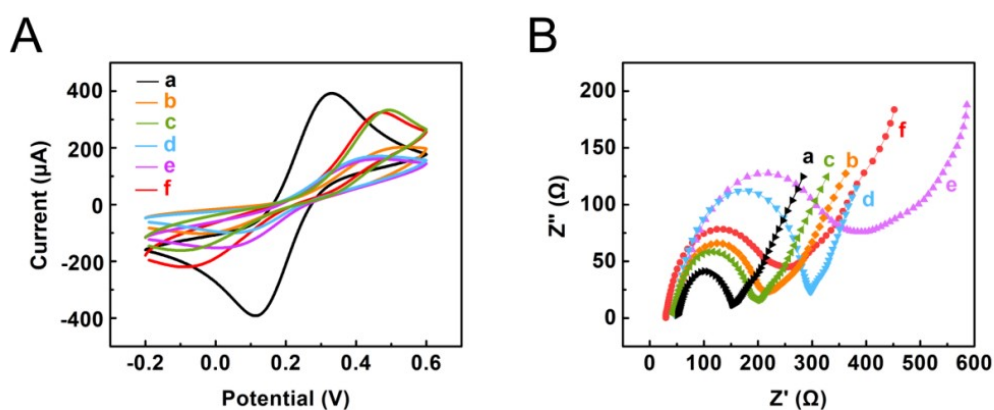

8 **Fig. S6** CV curves (A) and EIS plots (B) of (a) bare GCE, (b) Cu NCs@Zn-MOF/GCE, (c) Au  
 9 NPs/Cu NCs@Zn-MOF/GCE, (d) Fc-DNA/Au NPs/Cu NCs@Zn-MOF/GCE, (e) MCH/Fc-  
 10 DNA/Au NPs/Cu NCs@Zn-MOF/GCE, and (f) the activated CRISPR system incubated with  
 11 MCH/Fc-DNA/Au NPs/Cu NCs@Zn-MOF/GCE.  
 12

## 13 2.9. Quantitative analysis of band intensities in PAGE analysis

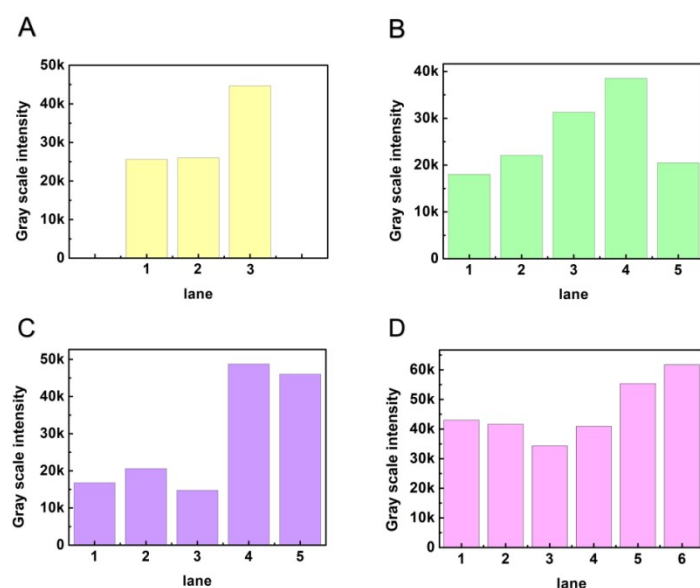

1

2 **Fig. S7** Grayscale intensity of the separated bands. (A) Hybridization of DNA walker and aptamer.  
3 Lane 1, aptamer; Lane 2, DNA walker; Lane 3, hybrid products of aptamer and DNA walker. (B)  
4 Formation process of the circular templates. Lane 1, locker; Lane 2, padlock; Lane 3, locker +  
5 padlock; Lane 4, locker + padlock + T4 ligase; Lane 5, locker + padlock + T4 ligase +  
6 exonuclease I and exonuclease III. (C) Construction of the IC probes. Lane 1, circular templates;  
7 Lane 2, H1; Lane 3, H2; Lane 4, IC probe1; Lane 5, IC probe2. (D) Process of RCA reaction.  
8 Lane 1, IC probe1; Lane 2, IC probe2; Lane 3, DNA walker; Lane 4, IC probes + DNA walker;  
9 Lane 5, IC probes + DNA walker + APE1; Lane 6, IC probes + DNA walker + APE1 + phi29  
10 DNA polymerase.

## 11 2.10. Exploration of the optimal experimental conditions

12 To improve the ECL detecting performances of this proposed strategy, some  
13 extremely momentous parameters about the activation time of CRISPR/Cas12a, the  
14 reaction time of RCA, and the concentration of Fc-DNA were investigated to obtain  
15 the optimal conditions. According to Fig. S8A, the ECL intensity gradually enhanced  
16 with the increase of activated time of CRISPR/Cas12a and approached a saturation  
17 point after 60 min, thus, the activated time of 60 min was chosen as the optimal time

1 throughout the experiment. Additionally, the RCA reaction time was an important  
2 element in improving the analytical performance of the developed sensing platform.  
3 As illustrated in Fig. S8B, it could be clearly observed that the ECL intensity  
4 consecutively increased accompanied by the increment of RCA reaction time, and  
5 reached the plateau at 60 min. Consequently, the reaction time of RCA was  
6 determined to be 60 min for the following experiments. Furthermore, the  
7 concentration of Fc-DNA was optimized as displayed in Fig. S8C. Briefly, the ECL  
8 response decreased rapidly as the concentration of Fc-DNA increased. When the  
9 concentration was at 2.0  $\mu\text{M}$ , an extremely low background signal was achieved so  
10 that 2.0  $\mu\text{M}$  was selected as the optimal condition to apply in the whole experiments.

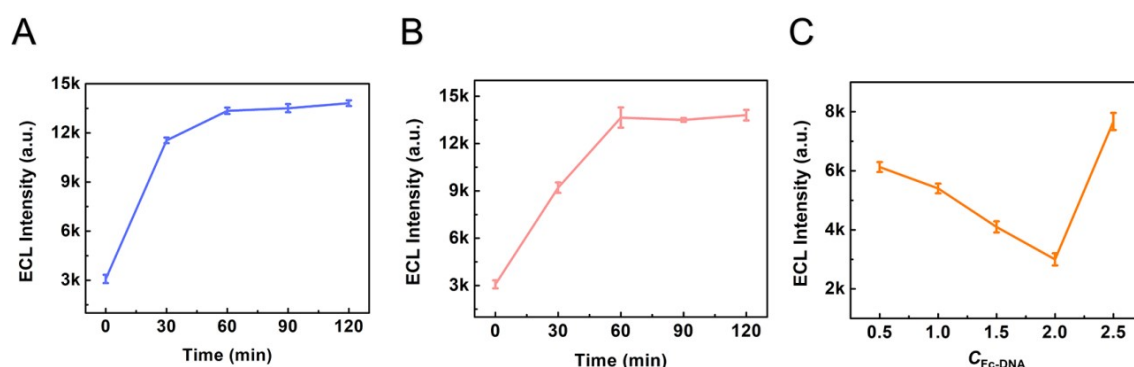

12 **Fig. S8** Exploration for the optimal experimental conditions. Optimizations of (A) the activated  
13 time of CRISPR/Cas12a system: 0 min, 30 min, 60 min, 90 min, and 120 min, (B) the reaction  
14 time of RCA: 0 min, 30 min, 60 min, 90 min, and 120 min, and (C) different concentrations of Fc-  
15 DNA: 0.5  $\mu\text{M}$ , 1.0  $\mu\text{M}$ , 1.5  $\mu\text{M}$ , 2.0  $\mu\text{M}$ , and 2.5  $\mu\text{M}$ .

## 16 2.11. The calculation procedure of detection limit

17 According to the previously reported reference, we adopted the traditional and

typical approach to calculate the detection limit of the proposed biosensor.<sup>4</sup> Briefly, three parallel experiments of the blank samples were carried out, and then the average ECL intensity ( $I_B$ ) was calculated to be 2323.9 a.u. with a standard deviation ( $S_B$ ) of 219. When the signal-to-noise ratio value ( $k_1$ ) was 3, the smallest detectable ECL signal could be calculated as

$$I_L = I_B + k_1 S_B = 2980.9$$

On the basis of the linear regression equation ( $I = 1981.46 \lg c + 7731.0$ ), the detection limit could be calculated as 4 pg mL<sup>-1</sup>.

## 2.12. Comparison of different methods for AMACR detection

**Table S4.** Comparison of different methods for AMACR detection.

| Test method | Linear range                                     | LOD                      | Ref       |
|-------------|--------------------------------------------------|--------------------------|-----------|
| DPV         | 1 µg mL <sup>-1</sup> ~ 10 µg mL <sup>-1</sup>   | 50 ng mL <sup>-1</sup>   | 5         |
| EIA         | 10 pg mL <sup>-1</sup> ~ 5 ng mL <sup>-1</sup>   | 4.6 pg mL <sup>-1</sup>  | 1         |
| ECL         | 10 ng mL <sup>-1</sup> ~ 100 µg mL <sup>-1</sup> | 1.25 ng mL <sup>-1</sup> | 6         |
| ECL         | 1 ng mL <sup>-1</sup> ~ 100 µg mL <sup>-1</sup>  | 0.1 ng mL <sup>-1</sup>  | 7         |
| ECL         | 10 pg mL <sup>-1</sup> ~ 1 µg mL <sup>-1</sup>   | 4 pg mL <sup>-1</sup>    | this work |

11

## References:

- [1] D. K. Yang, L. C. Chen, M. Y. Lee, C. H. Hsu and C. S. Chen, *Biosens. Bioelectron.*, 2014, **62**, 106-112.
- [2] Y. Li, F. Yang, R. Yuan, X. Zhong and Y. Zhuo, *Food Chem.*, 2022, **389**, 133049.
- [3] T. T. Tu, Y. M. Lei, Y. Q. Chai, Y. Zhuo and R. Yuan, *ACS Appl. Mater. Interfaces.*, 2020, **12**, 3945-3952.

- 
- [4] V. A. Zamolo, G. Valenti, E. Venturelli, O. Chaloin, M. Marcaccio, S. Boscolo, V. Castagnola, S. Sosa, F. Berti, G. Fontanive, M. Poli, A. Tubaro, A. Bianco, F. Paolucci and M. Prato, *ACS Nano*, 2012, **6**, 7989-7997.
- [5] J. W. Yao, Y. Wang, Y. F. Dai, C. C. Liu, *ACS Omega*. 2018, **3**, 6411-6418.
- [6] M. L. Liu, Y. Li, M. L. Zhao, Y. Zhuo and X. J. He, *Biosens. Bioelectron.*, 2022, **214**, 114512.
- [7] Y. Li, M. L. Liu, W. B. Liang, Y. Zhuo and X. J. He, *Biosens. Bioelectron.*, 2023, **238**, 115589.
